# Supplementary material
Source: PubMed Central journal article supplement (PMC2921666)

### **Supplementary Information:**

**Figure S1 : ON044580 does not inhibit recombinant p210 from Sf21 cells.** 100 ng of affinity purified recombinant wild type p210 kinase was incubated with indicated concentrations of inhibitor and processed for radiometric kinase assays. While Imatinib potently inhibited p210 at 1  $\mu$ M, ON044580 failed to inhibit recombinant p210 even at a concentration of 20  $\mu$ M.

S1

rp210-WT →

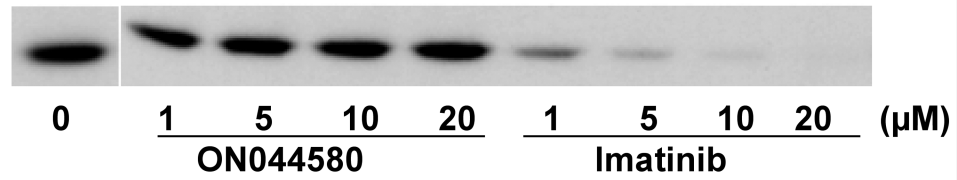

Supplement: NIHMS223143-supplement-Supplementary_Figure.pdf [file NIHMS223143-supplement-Supplementary_Figure.pdf]
